# Supplementary material for: A Co-Designed, Culturally-Tailored mHealth Tool to Support Healthy Lifestyles in Māori and Pasifika Communities in New Zealand: Protocol for a Cluster Randomized Controlled Trial
Source: PubMed Central journal article supplement (PMC6125615; doi:10.2196/10789), 2018-08-22
Supplement: resprot_v7i8e10789_app5.pdf [file resprot_v7i8e10789_app5.pdf]

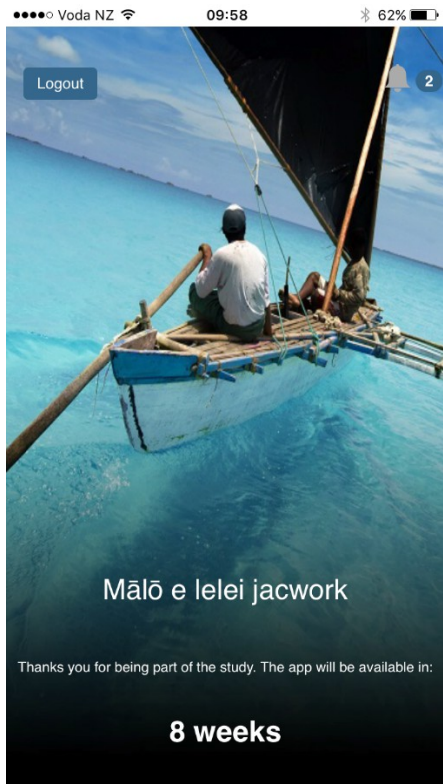

Figure 1: Pasifika version of the control app

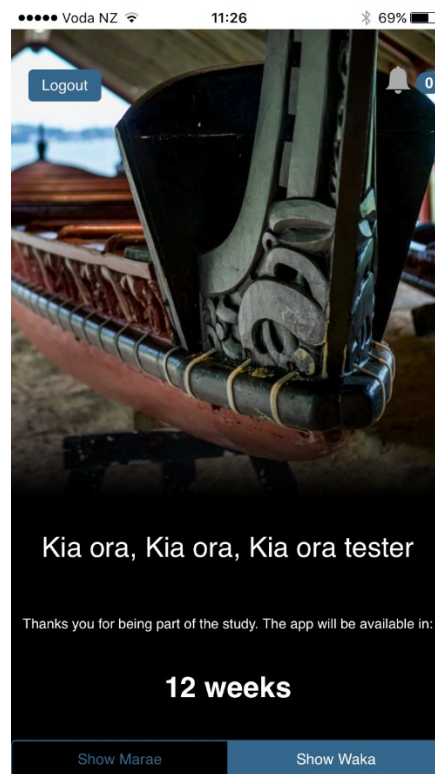

Figure 2: Māori version of the control app
